# Supplementary material for: Effect Of 5-Fluorouracil On The Expression Of Human Decorin Proteins "Invitro study"
Source: Research Square preprint supplement (doi:10.21203/rs.3.rs-6519831/v1), 2025-06-10
Supplement: Supplementary file 1 [file b38c6dd8e734fc0fb80b4a62.xlsx]

## Sheet: 5FU on SW620 medi (2
	SW620 MFI
HDCN	24 hrs.	48 hrs.	72 hrs.
Untreated	160	161	161
Untreated	161	160	159
5FU 1µg/ml	135	140	269
5FU 1µg/ml	142	146	263																									untreated	24h	48h	72h
5FU 10µg/ml	141	161	364																								5FU 1µg/ml	160.5	138.5	143	266
5FU 10µg/ml	142	153	364																								5FU 10µg/ml		141.5	157	364
5FU 100µg/ml	139	143	466																								5FU 100µg/ml		140.5	141	410.5
5FU 100µg/ml	142	139	355																								5fu 1000µg/ml		141	146.5	229.5
5FU 1000µg/ml	145	147	225
5FU 1000µg/ml	137	146	234
	SW620 Positivity %
HDCN	24 hrs.	48 hrs.	72 hrs.
Untreated	46.3	47.4	45.3																									untreated	24h	48h	72h
Untreated	46.2	47.3	45.2																								5FU 1µg/ml	46.3	3.9	10.2	84.9
5FU 1 µg/ml	6.39	21.9	76.4																								5FU 10µg/ml		9.5	34.7	93
5FU 1µg/ml	11.9	28.5	79.6																								5FU 100µg/ml		6.8	7.8	94.5
5FU 10µg/ml	4.95	13.5	94																								5fu 1000µg/ml		5.3	22.4	78.7
5FU 10µg/ml	6.3	8.22	95.4
5FU 100µg/ml	3.81	45.3	93.8
5FU 100µg/ml	8.32	34	93.4																									SW620 Positivity %
5FU 1000µg/ml	3.72	10.4	83																								HDCN	24 hrs.	48 hrs.	72 hrs.
5FU 1000µg/ml	3.68	23.4	84.5																								Untreated	46.25	47.35	45.25		46.2833
	SW620 MFI																										5FU 1µg/ml	3.9	10.2	84.9
HDCN	24 hrs.	48 hrs.	72 hrs.																								5FU 10µg/ml	9.5	34.7	93
Untreated	160.5	160.5	160																								5FU 100µg/ml	6.8	7.8	94.5
5FU 1 µg/ml	138.5	143	266																								5fu 1000µg/ml	5.3	22.4	78.7
5FU 10µg/ml	141.5	157	364
5FU 100µg/ml	140.5	141	410.5
5fu 1000µg/ml	141	146.5	229.5
	SW620 Positivity %
HDCN	24 hrs.	48 hrs.	72 hrs.
Untreated	46.25	47.35	45.25
5FU 1µg/ml	3.9	10.2	84.9
5FU 10µg/ml	9.5	34.7	93
5FU 100µg/ml	6.8	7.8	94.5
5fu 1000µg/ml	5.3	22.4	78.7
	SW620 Positivity %
HDCN	24 hrs.	48 hrs.	72 hrs.
Untreated	46.25	47.35	45.25
5FU 1µg/ml	3.9	10.2	84.9
5FU 10µg/ml	9.5	34.7	93
5FU 100µg/ml	6.8	7.8	94.5
5fu 1000µg/ml	5.3	22.4	78.7
0	46.25
0	3.9
1	9.5
2	6.8
3	5.3
Y=23.125	25.075
log=-0.066	-0.348
IC50=1.164	0.449	√
	48h
0	47.35
0	10.2
1	34.7
2	7.8											Incubation Period	24 hrs.	48 hrs.	72 hrs.
3	22.4										SW620	IC50	0.449	3.07	0.498
											HEK293	IC50	0.46	33.113	12.882
Y=27.575
log=0.487											Selectivity index		1.0245	10.786	25.8675
EC50=3.07	√
	72
0	45.25
0	84.9
1	93
2	94.5
3	78.7
Y=69.875
log=-0.303
EC50=2.009	0.498	√
		Table ( 1 ): Group statistics of HDCN MFI of SW620 cells after treatment with 5-FU
		Incubation period (hours)	SW620 cell line			*P value
		24 hours	5-FU Dose(µg/ml)	N	Mean ± SEM of HDCN MFI	Sig. (2-tailed)	ANOVA
			0	2	160.50 ± 0.50	0.036	0.007
			1	2	138.50 ± 3.50
			10	2	141.50 ± 0.50
			100	2	140.50 ± 1.50
			1000	2	141 ± 4.00
		48 hours	0	2	160.50 ± 0.50	0.002	0.008
			1	2	143 ± 3.00
			10	2	157 ± 4.00
			100	2	141 ± 2.00
			1000	2	146.50 ± 0.50
		72 hours	0	2	160 ± 1.000	0.002	0.004
			1	2	266 ± 3.00
			10	2	364 ± 0.00
			100	2	410.50 ± 55.5
			1000	2	229.50 ± 4.50
		P*: Significant if =0.05 or less

## Sheet: 5FU  on HEK293b median
	HEK293 MFI
HDCN	24 hrs.	48 hrs.	72 hrs.
Untreated	156	143	161
Untreated	156	158	161
5FU 1µg/ml	140	151	240
5FU 1µg/ml	140	138	225																									untreated	24h	48h	72h
5FU 10µg/ml	138	151	387																								5FU 1µg/ml	156	140	144.5	232.5
5FU 10µg/ml	139	151	388																								5FU 10µg/ml		138.5	151	387.5
5FU 100µg/ml	137	147	146																								5FU 100µg/ml		136.5	147.5	199.5
5FU 100µg/ml	136	148	253																								5fu 1000µg/ml		140	163	221.5
5FU 1000µg/ml	136	154	201
5FU 1000µg/ml	144	172	242
	HEK293 Positivity %
HDCN	24 hrs.	48 hrs.	72 hrs.
Untreated	23.9	27.5	24.7																									untreated	24h	48h	72h
Untreated	23.8	27.4	24.6																								5FU 1µg/ml	25.32	5.3	14.6	65.5
5FU 1µg/ml	6.2	25.8	44.8																								5FU 10µg/ml		3.6	27.6	28.6
5FU 1µg/ml	7.07	40.5	44.8																								5FU 100µg/ml		4.3	21.3	70
5FU 10µg/ml	5.8	19	58.3																								5fu 1000µg/ml		4.6	42	50
5FU 10µg/ml	5.18	18.7	66.7
5FU 100µg/ml	5.02	18.9	44.4
5FU 100µg/ml	7.11	20.5	34.8
5FU 1000µg/ml	7.66	11	45.3																								HDCN	24 hrs.	48 hrs.	72 hrs.
5FU 1000µg/ml	12.3	5.48	67.6																								Untreated	23.85	27.45	24.65		25.3167	avearage
	HEK293 MFI																										5FU 1µg/ml	5.3	14.6	65.5
HDCN	24 hrs.	48 hrs.	72 hrs.																								5FU 10µg/ml	3.6	27.6	28.6
Untreated	156	150.5	161																								5FU 100µg/ml	4.3	21.3	70
5FU 1µg/ml	140	144.5	232.5																								5fu 1000µg/ml	4.6	42	50
5FU 10µg/ml	138.5	151	387.5
5FU 100µg/ml	136.5	147.5	199.5
5fu 1000µg/ml	140	163	221.5
	HEK293 Positivity %
HDCN	24 hrs.	48 hrs.	72 hrs.
Untreated	23.85	27.45	24.65
5FU 1µg/ml	5.3	14.6	65.5			Incubation Period	24 hrs.	48 hrs.	72 hrs.
5FU 10µg/ml	3.6	27.6	28.6		SW620	IC50	0.449	3.07	0.498
5FU 100µg/ml	4.3	21.3	70		HEK293	IC50	0.46	33.113	12.882
5fu 1000µg/ml	4.6	42	50
					TI		1.0245	10.786	25.8675
	HEK293 Positivity %
HDCN	24 hrs.	48 hrs.	72 hrs.
Untreated	23.85	27.45	24.65
5FU 1µg/ml	5.3	14.6	65.5
5FU 10µg/ml	3.6	27.6	28.6
5FU 100µg/ml	4.3	21.3	70
5fu 1000µg/ml	4.6	42	50
	24 hrs.
0	23.85
0	5.3
1	3.6
2	4.3
3	4.6
Y=13.75	log=-0.337
EC50=0.460
0.46	√
	48 hrs.
0	27.45
0	14.6
1	27.6
2	21.3
3	42
Y=28	log=1.461
EC50=33.113
33.113	√
	72 hrs.
0	24.65
0	65.5
1	28.6
2	70
3	50
Y=47.325
log=1.11
EC50=12.882	√
	Table (2 ): Group statistics of HDCN MFI of HEK293 cells after treatment with 5-FU
	Incubation period (hours)	5-FU Dose(µg/ml)			*P value
			HEK293 cell line
	24 hours		N	Mean ± SEM of HDCN MFI	Sig. (2-tailed)	ANOVA
		0	2	156±0.001		0.003
		1	2	140±0.001
		10	2	138.5±0.50	0.031
		100	2	136.5±0.50
		1000	2	140±4.00
	48 hours	0	2	150.5±7.50	0.007	0.36
		1	2	144.5±6.50
		10	2	151±0.00
		100	2	147.5±0.50
		1000	2	163±9.00
	72 hours	0	2	161±0.00	0.01	0.01
		1	2	232.5±7.50
		10	2	387.5±0.50
		100	2	199.5±53.50
		1000	2	221.5±20.50
	P*: Significant if =0.05 or less

## Sheet: Therapeutic index of 5FU
													Incubation Period	24 hrs.	48 hrs.	72 hrs.
													Selectivity Index	1.0245	10.786	25.8675
					Incubation Period	24 hrs.	48 hrs.	72 hrs.
					5-FU IC50 on SW620	0.449	3.07	0.498
					5-FU IC50 on HEK293	0.46	33.113	12.882
					Selectivity Index	1.0245	10.786	25.8675
					MFI of untreated cells
						24 hrs.	48 hrs.	72 hrs.
					MFI HEK293	153	153	152
					MFI SW60	159	159	150
